# Supplementary material for: On the relation between avalanche occurrence and avalanche danger level
Source: Copernicus journal article supplement (doi:10.5194/tc-14-737-2020), 2020-03-02
Supplement: Supplementary file 1 [file tc-14-737-2020-supplement.pdf]

Supplement of The Cryosphere, 14, 737–750, 2020  
<https://doi.org/10.5194/tc-14-737-2020-supplement>  
© Author(s) 2020. This work is distributed under  
the Creative Commons Attribution 4.0 License.

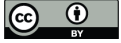

*Supplement of*

## **On the relation between avalanche occurrence and avalanche danger level**

**Jürg Schweizer et al.**

*Correspondence to:* Jürg Schweizer (schweizer@slf.ch)

The copyright of individual parts of the supplement might differ from the CC BY 4.0 License.

## 1. Study area

The study area with the mapped avalanches is shown in Figure S1.

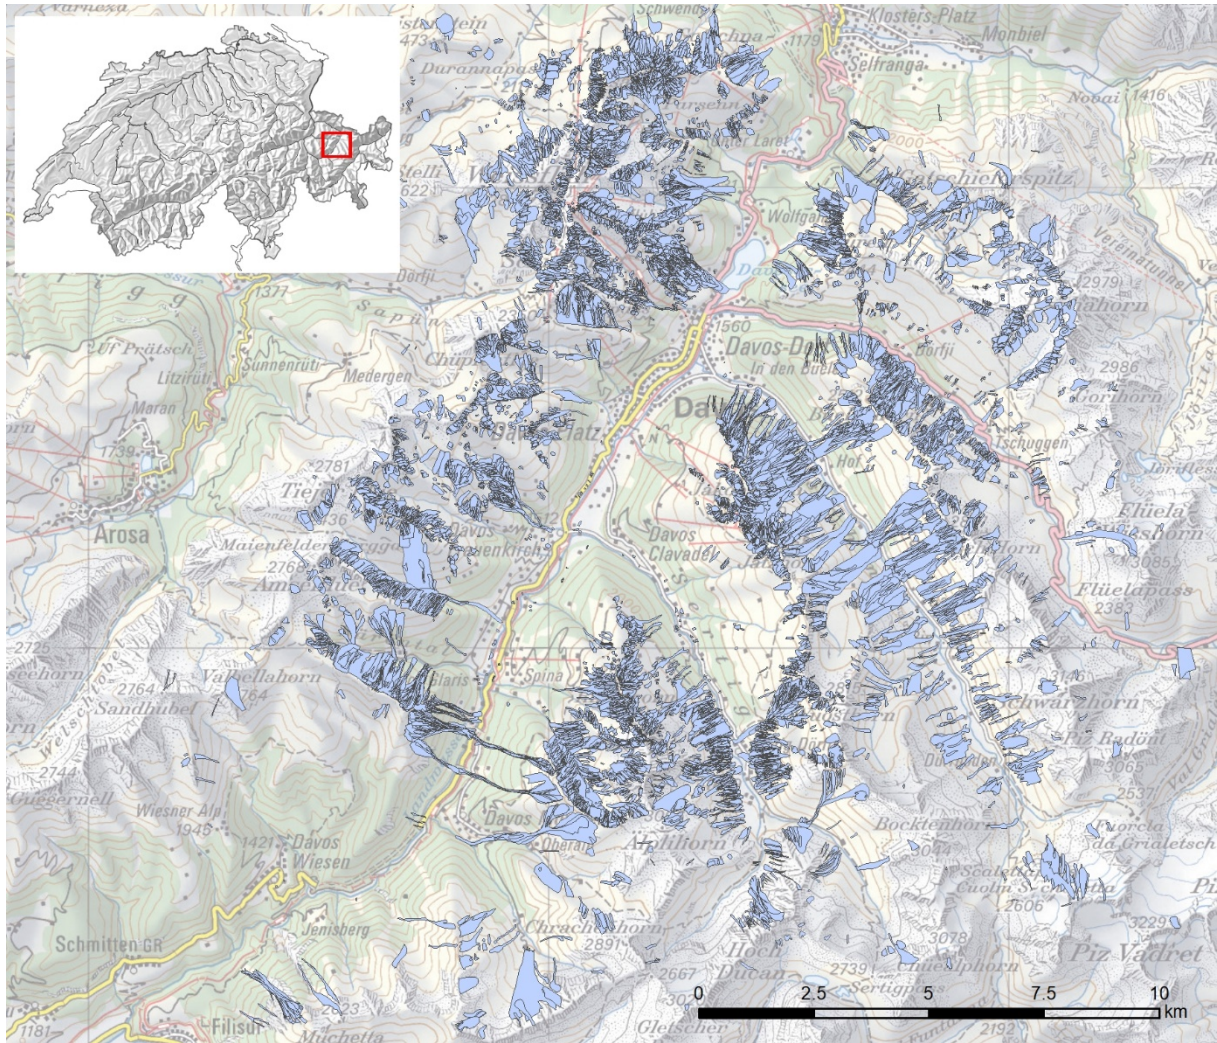

**Figure S1: Study area around Davos (Eastern Swiss Alps, see inset) with all mapped avalanches ( $N = 13\,918$ ) observed during the winters 1998–1999 to 2018–2019.**

## 2. Correction procedure

In the following we describe the correction procedure and provide a table showing all the changes (Table S1).

The procedure and the criteria are as follows:

1. We evaluated all days with danger levels 4–*High* or 5–*Very High* and a value of the AAI  $\leq 1$  (“zero or unusually low”).
2. We evaluated all days with danger level 3–*Considerable* and a value of the AAI  $> 13.6$  (after the first correction step), which was the median AAI for the days with danger level 4–*High* or 5–*Very High*.
3. We evaluated all days with danger level 2–*Moderate* and a value of the AAI  $> 1$ , which was the median AAI for the days with danger level 3–*Considerable*.
4. We evaluated all days with danger level 1–*Low* and value of the AAI  $> 1$ .

**Table S1: Frequency of danger levels before and after corrections. Also given are the changes per danger level.**

| Danger level   | Number of days before corrections | Change of danger level |    |      |    |    | Number of days after corrections |
|----------------|-----------------------------------|------------------------|----|------|----|----|----------------------------------|
|                |                                   | -2                     | -1 | 0    | +1 | +2 |                                  |
| 1–Low          | 306                               | -                      | -  | 303  | 1  | 2  | 303                              |
| 2–Moderate     | 1809                              | -                      | 0  | 1765 | 32 | 12 | 1766                             |
| 3–Considerable | 1367                              | 0                      | 0  | 1310 | 57 | -  | 1366                             |
| 4–High         | 47                                | 0                      | 21 | 24   | 2  | -  | 94                               |
| 5–Very High    | 4                                 | 1                      | 1  | 2    | -  | -  | 4                                |

### 3. Avalanche size distribution per danger level

The distribution of avalanche sizes per danger level was statistically compared with a pairwise Mann–Whitney *U*-test. The resulting *p*-values are given in Table S2.

**Table S2: Statistical test results for pairwise comparison of avalanche size distributions between the danger levels: *p*-values are shown obtained with Mann–Whitney *U*-Test.**

|                | 1–Low | 2–Moderate | 3–Considerable | 4–High | 5–Very High |
|----------------|-------|------------|----------------|--------|-------------|
| 1–Low          | 1     | 0.568      | 0.442          | 0.047  | <0.001      |
| 2–Moderate     | -     | 1          | 0.392          | <0.001 | <0.001      |
| 3–Considerable | -     | -          | 1              | <0.001 | <0.001      |
| 4–High         | -     | -          | -              | 1      | <0.001      |
| 5–Very High    | -     | -          | -              | -      | 1           |

### 4. Avalanche length

The distribution of avalanche length is shown in Figure S2 for each of the five danger levels.

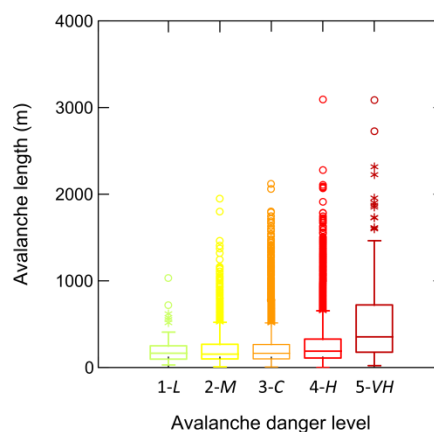

**Figure S2: Avalanche length per avalanche danger level. Boxes span the interquartile range from first to third quartiles with a horizontal line showing the median. Whiskers show the range of observed values that fall within 1.5 times the interquartile range above the third and below the first quartiles. Asterisks and open circles refer to outliers and far outliers beyond the fences (N=13 745).**
